# Supplementary material
Source: PubMed Central journal article supplement (PMC4226346)
Supplement: supp_pp.114.248963_248963revSupplemental_material.2.pdf [file supp_pp.114.248963_248963revSupplemental_material.2.pdf]

**Table S4. Correlations between root-fit components estimated for 31 Arabidopsis accessions studied between different salt stress concentrations.** Pearson correlation coefficients were calculated on average trait values per accession using SPSS software. Significant correlations are marked with \* for the significance level of 0.05 and \*\* for 0.01.

|                 | MR<br>0 mM NaCl | MR<br>75 mM NaCl | MR<br>125 mM<br>NaCl | #LR<br>0 mM NaCl | #LR<br>75 mM NaCl | #LR<br>125 mM<br>NaCl | aLR<br>0 mM NaCl | aLR<br>75 mM<br>NaCl | aLR<br>125 mM<br>NaCl | MR<br>75 / 0 | #LR<br>75 / 0 | aLR<br>75 / 0 | MR<br>125 / 0 | #LR<br>125 / 0 | aLR<br>125 / 0 | TRS<br>75 / 0 | TRS<br>125 / 0 |
|-----------------|-----------------|------------------|----------------------|------------------|-------------------|-----------------------|------------------|----------------------|-----------------------|--------------|---------------|---------------|---------------|----------------|----------------|---------------|----------------|
| MR 0 mM NaCl    | x               |                  |                      |                  |                   |                       |                  |                      |                       |              |               |               |               |                |                |               |                |
| MR 75 mM NaCl   | .725**          | x                |                      |                  |                   |                       |                  |                      |                       |              |               |               |               |                |                |               |                |
| MR 125 mM NaCl  | .479**          | .655**           | x                    |                  |                   |                       |                  |                      |                       |              |               |               |               |                |                |               |                |
| #LR 0 mM NaCl   | .492**          | .402*            | .226                 | x                |                   |                       |                  |                      |                       |              |               |               |               |                |                |               |                |
| #LR 75 mM NaCl  | .566**          | .651**           | .417*                | .711**           | x                 |                       |                  |                      |                       |              |               |               |               |                |                |               |                |
| #LR 125 mM NaCl | .348            | .163             | .381*                | .316             | .402*             | x                     |                  |                      |                       |              |               |               |               |                |                |               |                |
| aLR 0 mM NaCl   | .297            | .209             | .286                 | .333             | .386*             | .333                  | x                |                      |                       |              |               |               |               |                |                |               |                |
| aLR 75 mM NaCl  | .170            | -.139            | -.049                | .289             | .200              | .371*                 | .407*            | x                    |                       |              |               |               |               |                |                |               |                |
| aLR 125 mM NaCl | .267            | .054             | -.167                | .172             | .337              | .346                  | .415*            | .448*                | x                     |              |               |               |               |                |                |               |                |
| MR 75 / 0       | .185            | .803**           | .476**               | .180             | .449**            | -.095                 | .043             | -.320                | -.134                 | x            |               |               |               |                |                |               |                |
| #LR 75 / 0      | .357*           | .520**           | .402*                | .200             | .811**            | .288                  | .254             | .022                 | .288                  | .425*        | x             |               |               |                |                |               |                |
| aLR 75 / 0      | .010            | -.263            | -.205                | .146             | .049              | .214                  | -.113            | .835**               | .209                  | -.365*       | -.060         | x             |               |                |                |               |                |
| MR 125 / 0      | -.019           | .308             | .857**               | .007             | .171              | .290                  | .113             | -.141                | -.320                 | .393*        | .260          | -.215         | x             |                |                |               |                |
| #LR 125 / 0     | .061            | -.076            | .236                 | -.184            | .031              | .855**                | .142             | .211                 | .240                  | -.204        | .180          | .136          | .274          | x              |                |               |                |
| aLR 125 / 0     | .170            | .004             | -.258                | .085             | .244              | .261                  | -.026            | .271                 | .875**                | -.125        | .233          | .287          | -.349*        | .215           | x              |               |                |
| TRS 75 / 0      | .194            | .380*            | .186                 | -.086            | .275              | .098                  | -.390*           | .241                 | .097                  | .394*        | .396*         | .493**        | .119          | .107           | .302           | x             |                |
| TRS 125 / 0     | -.003           | .189             | .482**               | -.431*           | -.062             | .288                  | -.400*           | -.178                | -.034                 | .219         | .251          | -.008         | .593**        | .503**         | .160           | .575**        | x              |
