# Supplementary material
Source: PubMed Central journal article supplement (PMC4226346)
Supplement: supp_pp.114.248963_248963revsupplemental_materialfigs.pdf [file supp_pp.114.248963_248963revsupplemental_materialfigs.pdf]

## Supplemental Figures

Figure S1

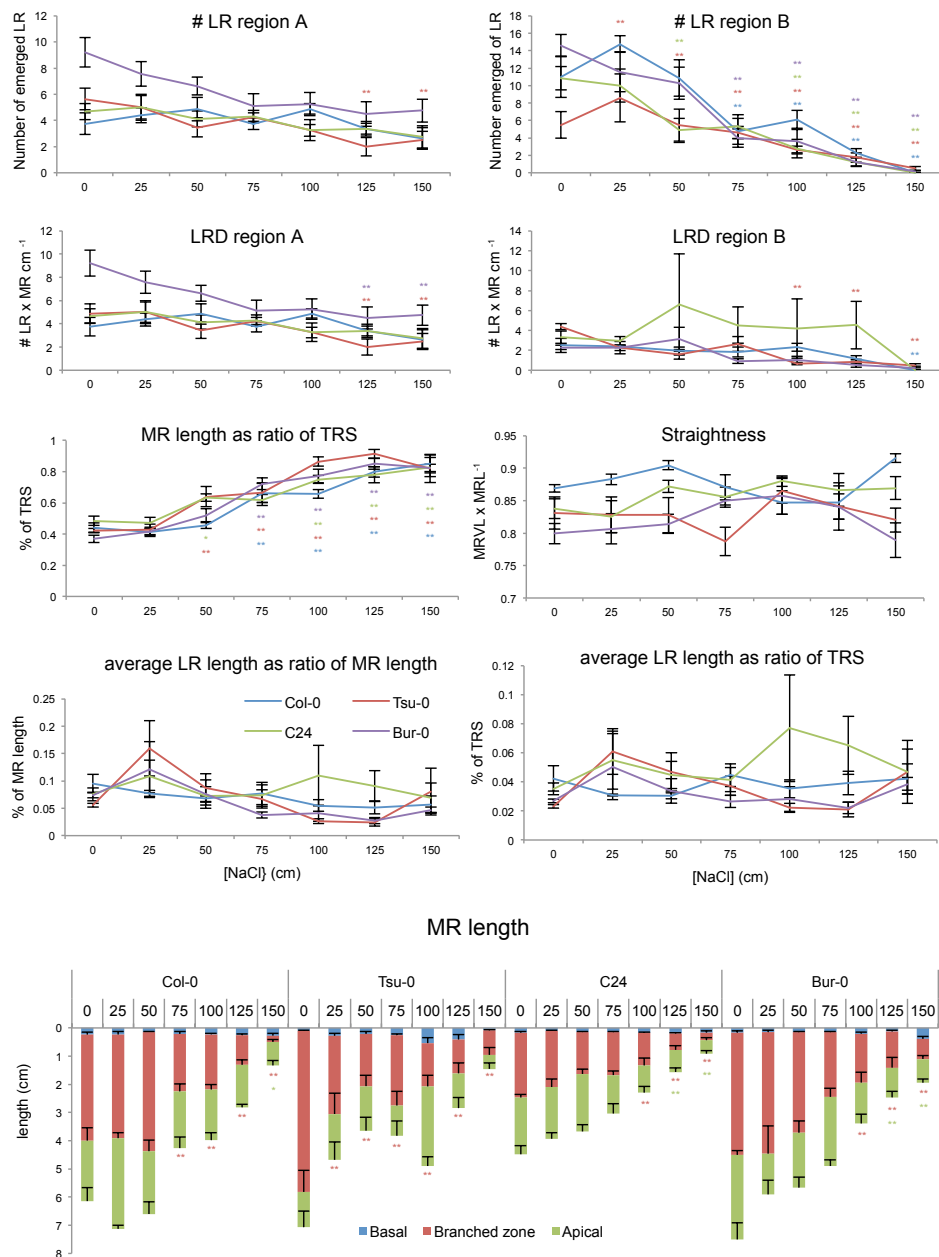

**Figure S 1. Salt treatment has a different effect on emerged LR number above and below the transfer point but does not affect LR density, straightness or MR zonation of 11 days old seedlings of Col-0, Tsu-0, C24 and Bur-0 Arabidopsis accessions.** Four days old seedlings of four Arabidopsis accessions (Col-0, Tsu-0, C24 and Bur-0) were transferred to media supplemented with different NaCl concentrations ranging from 0 to 150mM. 11 days after germination the RSA of the seedlings grown at different conditions was phenotypes and quantified using EZ-Rhizo software. The individual points represent the average trait value of 8 replicates. The error bars represent standard errors. The effect of salt stress was defined as significant when the RSA trait value in salt stress conditions was tested significantly different from control conditions with Tuckey's post-hoc test with significance of 0.05 (\*) or 0.01 (\*\*). The significant differences are indicated with asterisks in colours corresponding to those of the individual accessions.

**Figure S2**

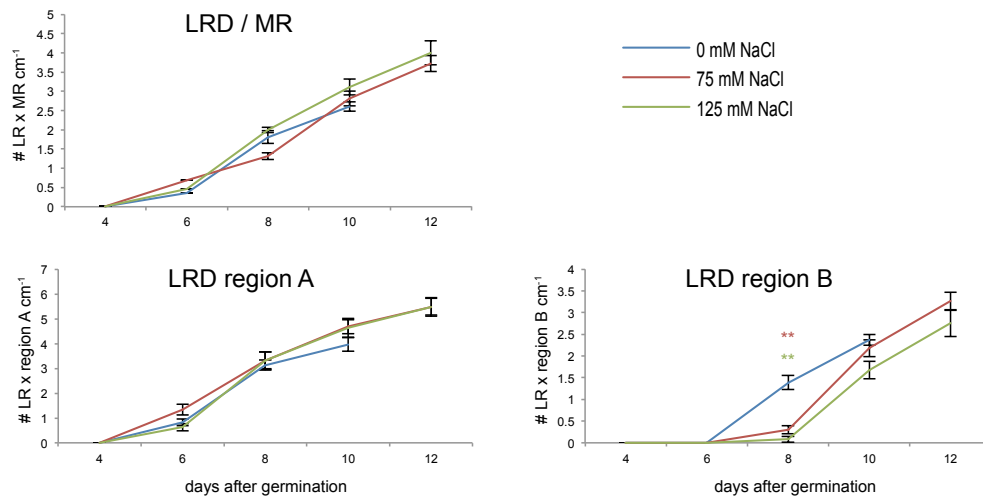

**Figure S 2. Dynamics of emerged Lateral Root Density development calculated per entire MR as well as for the region above and below the transfer point.** Dynamics in Lateral Root Density was calculated for the entire MR region as well as region above (region A) and below (region B) transfer point. The individual data points for observed growth are representing the average value of 24 replicates. Error bars represent the standard error. The effect of salt stress was defined as significant when the RSA trait value in salt stress conditions was tested significantly different from control conditions with Tuckey's post-hoc test with significance of 0.05 (\*) or 0.01 (\*\*). The significant differences are indicated with asterisks in colours corresponding to those of the salt stress treatments.

**Figure S3**

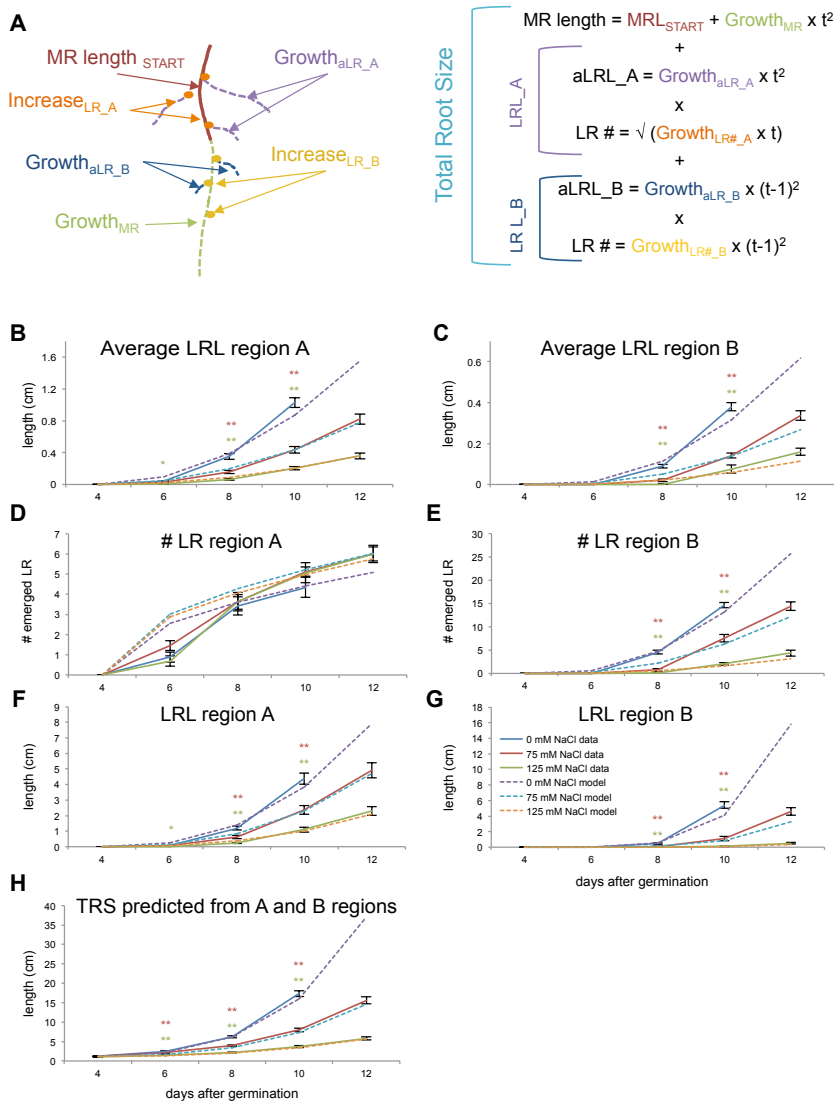

**Figure S 3. Describing RSA dynamics of Lateral Root development above and below the transfer point yield similar predictions of Total Root Size as the simplified (ROOT-FIT) model. (A)** TRS is defined by the combination of MR length and emerged LR length in the root segment above the transfer point (region A) and below the transfer point (region B). The LR length above the transfer point is determined by average LR length (aLRL\_A) and number of LR (LR#\_A). The INCREASE<sub>LR#\_A</sub> is best described with a square root function as the length of the root is not increasing and the #LR is saturated at some point. The LR length below the transfer point is determined like described above but with one day of delay and using a quadratic function for INCREASE<sub>#LR\_B</sub>. The descriptive quadratic growth models for individual parameters (dashed lines) were compared with the observed growth rates (solid lines) at growth conditions. The models describing individual RSA parameters were tested for fitting the data of average LR length in region above (B) and below (C) the transfer point as well as #LR in region above (D) and below (E) the transfer point. The individual models of INCREASE<sub>#LR\_A</sub> and GROWTH<sub>aLR\_A</sub> as well as INCREASE<sub>#LR\_B</sub> and GROWTH<sub>aLR\_B</sub> were combined for describing the increase of cumulative LR length increase in MR region (F) above (LRL region A) and (G) below (LRL region B) the transfer point. The models were further combined for describing (H) Total Root Size. The individual data points for observed growth are representing the average value of 24 replicates. Error bars represent the standard error. The  $r^2$  values for for curve fit are presented in Table SII. The effect of salt stress was defined as significant when the RSA trait value in salt stress conditions was tested significantly different from control conditions with Tuckey's post-hoc test with significance of 0.05 (\*) or 0.01 (\*\*). The significant differences are indicated with asterisks in colours corresponding to those of the salt stress treatments.

**Figure S4**

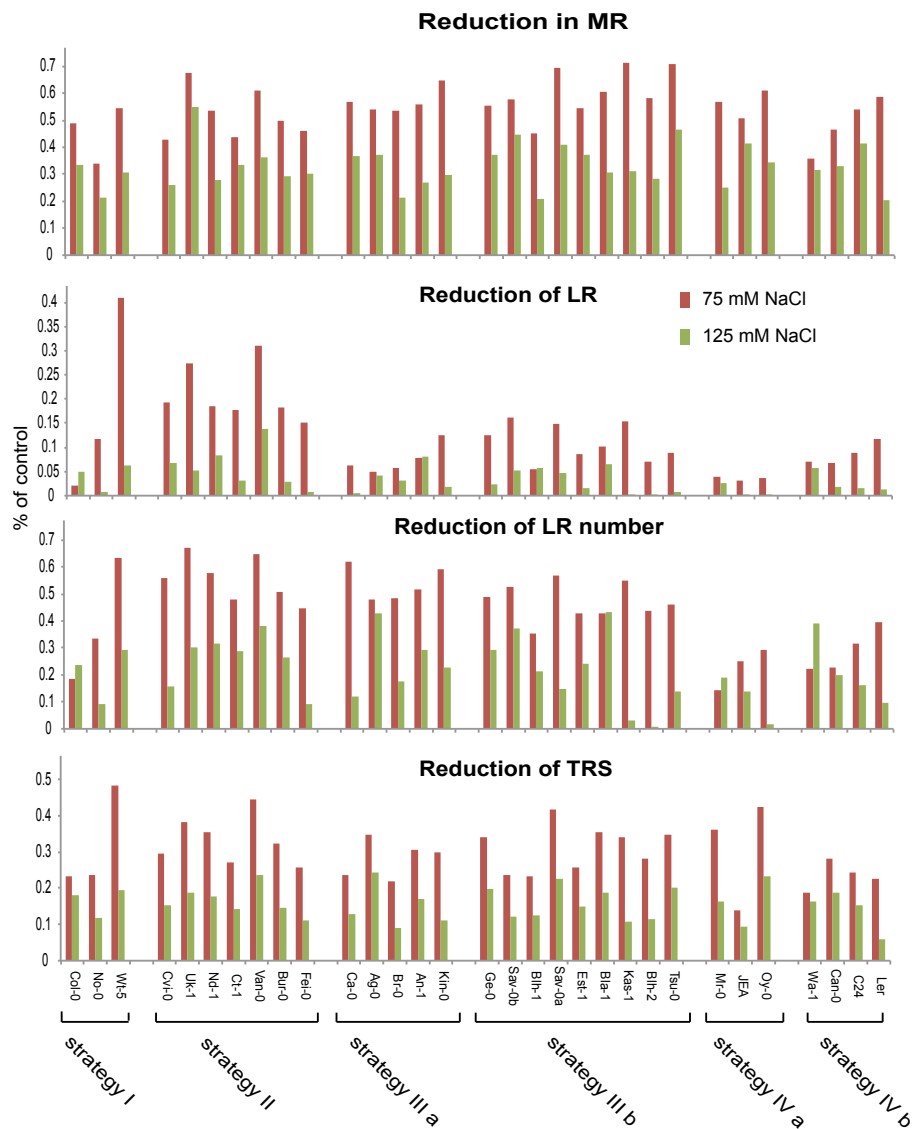

**Figure S 4. Reduction in MR, LR number and average LR length by salt stress for the individual Arabidopsis accessions clustered into four distinct responses.** Four days old seedlings of 32 Arabidopsis accessions (Table SII) were transferred to media supplemented with 0, 75 or 125 mM NaCl concentrations. Root growth was measured between 4<sup>th</sup> and 12<sup>th</sup> day after germination using EZ-Rhizo software and the growth rates for individual RSA component were described with quadratic growth functions. The growth rates of individual parameters were calculated based on average of 4 seedlings per accession per growth conditions. The reduction in MR, LR length, LR number and Total Root Size was calculated based on the quadratic growth function predicted values (Fig. 2 A) for 12 days old seedlings in both conditions.

**Figure S5**

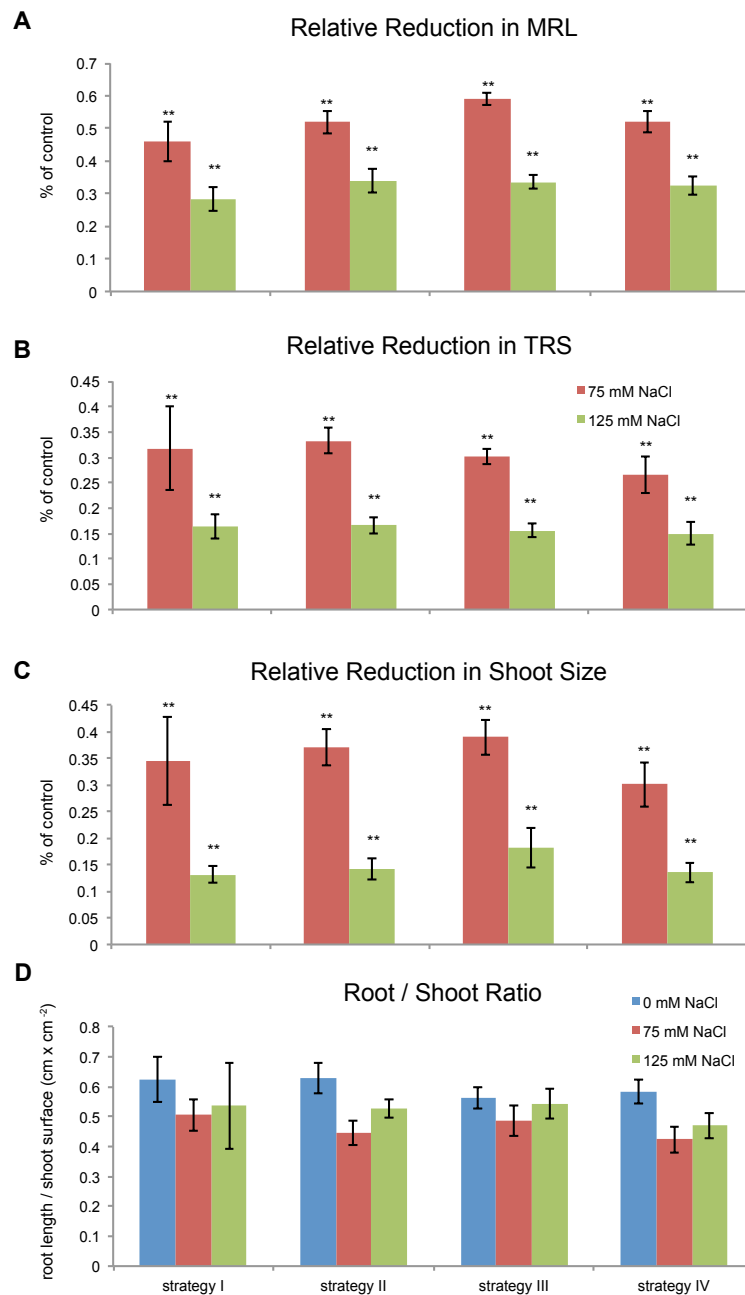

**Figure S 5. Decrease in overall root and shoot mass does not vary between four different strategies identified.** Accessions were categorized in groups representing different RSA strategies based on their relative decrease in different RSA parameters (Fig. 5). The differences between the strategies were examined in terms of reduction in (A) MRL and (B) TRS caused by salt stress as described with quadratic growth model for 12 days old plants (C) shoot surface reduction as observed in plate grown 12 days old plants and (D) and shifts in shoot to root ratio measured in 10 days old plants. The bars represent the average values of 31 accessions divided into four classes depending on their RSA strategy type. The error bars represent the standard error calculated for all accessions belonging to certain strategy type. The effect of salt stress was defined as significant when the RSA trait value in salt stress conditions was tested significantly different from control conditions with Tuckey's post-hoc test with significance of 0.05 (\*) or 0.01 (\*\*). No significant differences in the impact of salt on MRL, TRS, shoot surface or shoot to root ratio were detected between seedlings belonging to different RSA strategies.

**Figure S6**

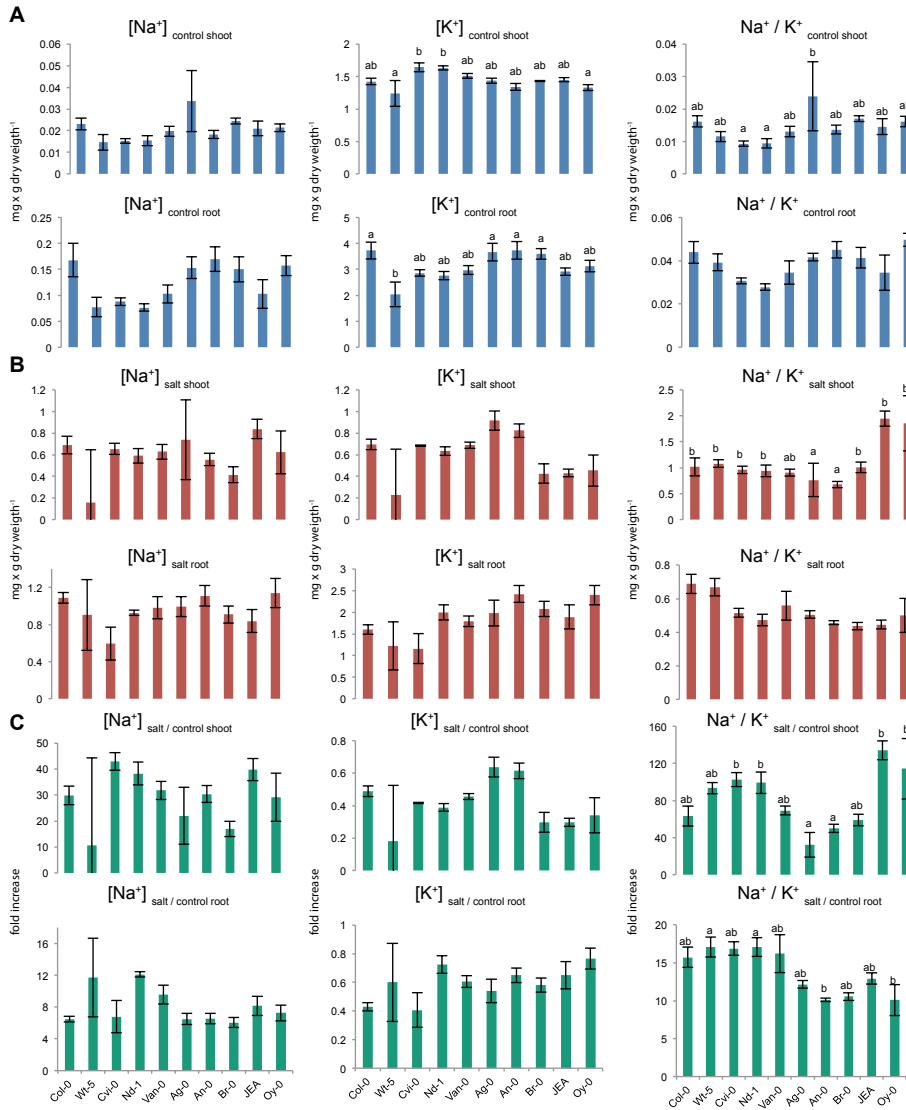

**Figure S 6. Accumulation of Na<sup>+</sup> and K<sup>+</sup> in root and shoot tissue of 10 individual Arabidopsis accessions exhibiting different RSA strategies grown in standard and mild salt stress conditions.** Four days old seedlings of 10 Arabidopsis accessions were transferred to standard media supplemented with 0 and 75 mM NaCl. Ten 12-days old seedlings were pooled and divided into shoot and root samples. The Na<sup>+</sup> and K<sup>+</sup> contents were determined for plants grown at **(A)** control and **(B)** 75 mM NaCl conditions as well as the **(C)** ratio's of ion accumulation between control and salt stress conditions. Bars represent the average ion accumulation of 4 samples. Error bars represent standard error. Differences between relative growth rates were tested with one-way ANOVA with Tuckey's post-hoc test of significance. Different letter codes represent groups differing from each other with significance level of 0.05.

## Supplemental Tables

**Table S1. Values of RSA growth parameters and  $r^2$  values as used in the descriptive growth model.** Root growth rate coefficients were calculated on data collected from 22 replicates by using LINEST function in excel. The fitting of descriptive models was tested on average value per RSA trait per condition by calculating the coefficient of determination ( $r^2$ ).

| Quadratic growth model (as in Fig. 2) |            |        |        |        |        |
|---------------------------------------|------------|--------|--------|--------|--------|
|                                       | [NaC] (mM) | MRL    | #LR    | aLRL   | TRS    |
| Growth rates                          | 0          | 0.1899 | 0.4855 | 0.0133 |        |
|                                       | 75         | 0.0842 | 0.3180 | 0.0077 |        |
|                                       | 125        | 0.0318 | 0.1585 | 0.0054 |        |
| $r^2$                                 | 0          | 0.9562 | 0.9850 | 0.9887 | 0.9934 |
|                                       | 75         | 0.8048 | 0.9857 | 0.9979 | 0.9573 |
|                                       | 125        | 0.6504 | 0.9602 | 0.9414 | 0.9075 |

| Quadratic and square root functions used to describe parameter (as in Fig. S2) |            |                 |                 |                  |                  |                 |                 |        |
|--------------------------------------------------------------------------------|------------|-----------------|-----------------|------------------|------------------|-----------------|-----------------|--------|
|                                                                                | [NaC] (mM) | #LR<br>region A | #LR<br>region B | aLRL<br>region A | aLRL<br>region B | LRL<br>region A | LRL<br>region B | TRS    |
| Growth rates                                                                   | 0          | 3.2426          | 0.5236          | 0.0242           | 0.0126           |                 |                 |        |
|                                                                                | 75         | 4.5583          | 0.2493          | 0.0121           | 0.0055           |                 |                 |        |
|                                                                                | 125        | 4.1332          | 0.0632          | 0.0057           | 0.0023           |                 |                 |        |
| $r^2$                                                                          | 0          | 0.7813          | 0.9809          | 0.9622           | 0.9498           | 0.9722          | 0.8893          | 0.9890 |
|                                                                                | 75         | 0.8293          | 0.9551          | 0.9882           | 0.9445           | 0.9863          | 0.8359          | 0.9957 |
|                                                                                | 125        | 0.7283          | 0.8577          | 0.9668           | 0.7973           | 0.9191          | 0.4337          | 0.9645 |

**Table S2. List of *Arabidopsis thaliana* accessions used for screening salt induced changes in RSA.** Accessions were ordered from European Arabidopsis stock centre (NASC) and propagated under the same conditions in order to ensure comparable seed quality

| ABRC identifier | Accession name | site    | country |
|-----------------|----------------|---------|---------|
| CS76113         | Col-0          | Col     | USA     |
| CS28090         | Blh-2          | Blh     | CZE     |
| CS28128         | Ca-0           | Ca      | GER     |
| CS28564         | No-0           | No      | GER     |
| CS28725         | Sav-0          | Slavice | CZE     |
| CS28780         | Tsu-0          | Tsu     | JPN     |
| CS28787         | Uk-1           | Uk      | GER     |
| CS28804         | Wa-1           | Wa      | POL     |
| CS76087         | Ag-0           | Ag      | FRA     |
| CS76091         | An-1           | An      | BEL     |
| CS76097         | Bla-1          | Bla     | ESP     |
| CS76098         | Blh-1          | Blh     | CZE     |
| CS76101         | Br-0           | Br      | CZE     |
| CS76105         | Bur-0          | Bur     | IRL     |
| CS76106         | C24            | Co      | POR     |
| CS76109         | Can-0          | Can     | ESP     |
| CS76114         | Ct-1           | Ct      | ITA     |
| CS76116         | Cvi-0          | Cvi     | CPV     |
| CS76127         | Est-1          | Est     | RUS     |
| CS76129         | Fei-0          | Fei     | POR     |
| CS76135         | Ge-0           | Ge      | SUI     |
| CS76148         | JEA            | JEA     | FRA     |
| CS76150         | Kas-1          | Kas     | IND     |
| CS76153         | Kin-0          | Kin     | USA     |
| CS76164         | Ler-1          | Ler     | GER     |
| CS76190         | Mr-0           | Mr      | ITA     |
| CS76197         | Nd-1           | Nd      | SUI     |
| CS76203         | Oy-0           | Oy      | NOR     |
| CS76225         | Sav-0          | Slavice | CZE     |
| CS76297         | Van-0          | Van     | CAN     |
| CS76304         | Wt-5           | Wt      | GER     |
| CS76305         | Yo-0           | Yo      | USA     |



**Table S3.** Growth parameters for individual RSA traits calculated per accessions.

| Acc    | MR    | MR    | MR     | noLR  | noLR  | noLR   | aLR   | aLR   | aLR    |
|--------|-------|-------|--------|-------|-------|--------|-------|-------|--------|
|        | 0 mM  | 75 mM | 125 mM | 0 mM  | 75 mM | 125 mM | 0 mM  | 75 mM | 125 mM |
| Uk-1   | 0,040 | 0,023 | 0,016  | 0,311 | 0,208 | 0,093  | 0,007 | 0,003 | 0,001  |
| C24    | 0,077 | 0,036 | 0,025  | 0,321 | 0,102 | 0,053  | 0,008 | 0,002 | 0,001  |
| Can-0  | 0,095 | 0,039 | 0,024  | 0,191 | 0,044 | 0,038  | 0,008 | 0,002 | 0,002  |
| Kas-1  | 0,109 | 0,074 | 0,026  | 0,333 | 0,184 | 0,010  | 0,011 | 0,003 | 0,001  |
| Ag-0   | 0,117 | 0,058 | 0,038  | 0,204 | 0,097 | 0,087  | 0,006 | 0,001 | 0,001  |
| Br-0   | 0,124 | 0,062 | 0,017  | 0,306 | 0,148 | 0,054  | 0,014 | 0,002 | 0,003  |
| Cvi-0  | 0,128 | 0,049 | 0,025  | 0,257 | 0,143 | 0,041  | 0,011 | 0,004 | 0,005  |
| Mr-0   | 0,130 | 0,067 | 0,023  | 0,218 | 0,031 | 0,041  | 0,007 | 0,002 | 0,001  |
| Fei-0  | 0,131 | 0,055 | 0,032  | 0,429 | 0,191 | 0,040  | 0,010 | 0,003 | 0,001  |
| Wa-1   | 0,131 | 0,041 | 0,033  | 0,258 | 0,057 | 0,101  | 0,013 | 0,004 | 0,002  |
| Ler    | 0,131 | 0,072 | 0,018  | 0,546 | 0,216 | 0,053  | 0,014 | 0,004 | 0,002  |
| Sav-0a | 0,140 | 0,094 | 0,050  | 0,358 | 0,203 | 0,053  | 0,007 | 0,002 | 0,002  |
| Ge-0   | 0,140 | 0,072 | 0,044  | 0,319 | 0,156 | 0,093  | 0,008 | 0,002 | 0,001  |
| No-0   | 0,142 | 0,043 | 0,021  | 0,356 | 0,120 | 0,033  | 0,006 | 0,002 | 0,001  |
| Wt-5   | 0,144 | 0,072 | 0,036  | 0,347 | 0,220 | 0,102  | 0,006 | 0,004 | 0,001  |
| Ct-1   | 0,149 | 0,059 | 0,041  | 0,383 | 0,183 | 0,111  | 0,012 | 0,004 | 0,001  |
| Oy-0   | 0,149 | 0,085 | 0,044  | 0,232 | 0,068 | 0,004  | 0,005 | 0,001 | 0,000  |
| Est-1  | 0,149 | 0,075 | 0,047  | 0,461 | 0,197 | 0,111  | 0,009 | 0,002 | 0,001  |
| JEA    | 0,150 | 0,071 | 0,053  | 0,586 | 0,148 | 0,082  | 0,015 | 0,002 | 0,000  |
| Tsu-0  | 0,151 | 0,104 | 0,063  | 0,419 | 0,192 | 0,058  | 0,009 | 0,002 | 0,000  |
| Yo-0   | 0,153 | 0,059 | 0,033  | 0,434 | 0,159 | 0,093  | 0,010 | 0,012 | 0,001  |
| Blh-2  | 0,155 | 0,084 | 0,035  | 0,349 | 0,152 | 0,002  | 0,011 | 0,002 | 0,000  |
| Bla-1  | 0,155 | 0,088 | 0,038  | 0,267 | 0,115 | 0,116  | 0,010 | 0,002 | 0,001  |
| Sav-0b | 0,157 | 0,083 | 0,063  | 0,515 | 0,272 | 0,190  | 0,024 | 0,007 | 0,003  |
| Kin-0  | 0,163 | 0,103 | 0,039  | 0,482 | 0,284 | 0,110  | 0,012 | 0,003 | 0,001  |
| Van-0  | 0,166 | 0,095 | 0,051  | 0,372 | 0,241 | 0,142  | 0,010 | 0,005 | 0,004  |
| An-1   | 0,166 | 0,086 | 0,035  | 0,330 | 0,170 | 0,096  | 0,009 | 0,001 | 0,003  |
| Blh-1  | 0,169 | 0,069 | 0,027  | 0,432 | 0,152 | 0,092  | 0,008 | 0,001 | 0,002  |
| Bur-0  | 0,173 | 0,079 | 0,043  | 0,384 | 0,195 | 0,102  | 0,009 | 0,003 | 0,001  |
| Nd-1   | 0,181 | 0,090 | 0,040  | 0,396 | 0,229 | 0,125  | 0,008 | 0,003 | 0,002  |
| Col-0  | 0,190 | 0,083 | 0,028  | 0,478 | 0,311 | 0,156  | 0,014 | 0,008 | 0,005  |
| Ca-0   | 0,193 | 0,104 | 0,062  | 0,390 | 0,242 | 0,047  | 0,016 | 0,002 | 0,001  |
